# Supplementary material for: Magnetic-Field-Assisted Molecular Beam Epitaxy: Engineering of Fe3O4 Ultrathin Films on MgO(111)
Source: MDPI journal article supplement (doi:10.3390/ma16041485), 2023-02-10
Supplement: s1 [file s1]

## Supplementary Material

# Magnetic-Field-Assisted Molecular Beam Epitaxy: Engineering of Fe<sub>3</sub>O<sub>4</sub> Ultrathin Films on MgO(111)

Adam Dziwoki <sup>1,2</sup>, Bohdana Blyzniuk <sup>1</sup>, Kinga Freindl <sup>1</sup>, Ewa Madej <sup>1</sup>, Ewa Młyńczak <sup>1</sup>, Dorota Wilgocka-Ślęzak <sup>1</sup>, Józef Korecki <sup>1,\*</sup> and Nika Spiridis <sup>1</sup>

<sup>1</sup> Jerzy Haber Institute of Catalysis and Surface Chemistry, Polish Academy of Sciences, Niezapominajek 8, 30-239 Krakow, Poland

<sup>2</sup> PREVAC sp. z o.o., Raciborska Str. 61, 44-362 Rogów, Poland

\* Correspondence: jozef.korecki@ikifp.edu.pl

**Table S1.** Best fit parameters of the CEMS spectra octahedral (A) and tetrahedral (B) sites.

B<sub>hf</sub> is hyperfine magnetic field, IS is isomer shift relative to  $\alpha$ -Fe,  $\epsilon$  is quadrupole shift.

| Sample   | Site | B <sub>hf</sub> [T] | IS [mm/s] | $\epsilon$ [mm/s] | Relative intensity % |
|----------|------|---------------------|-----------|-------------------|----------------------|
| No-field | A    | 47.5 (1)            | 0.26(1)   | 0.00(1)           | 33(1)                |
|          | B    | 44.9 (2)            | 0.63(1)   | 0.00(1)           | 67(1)                |
| In-field | A    | 47.4 (2)            | 0.26(1)   | 0.01(1)           | 32(1)                |
|          | B    | 44.7(2)             | 0.63(1)   | 0.00(1)           | 68(1)                |

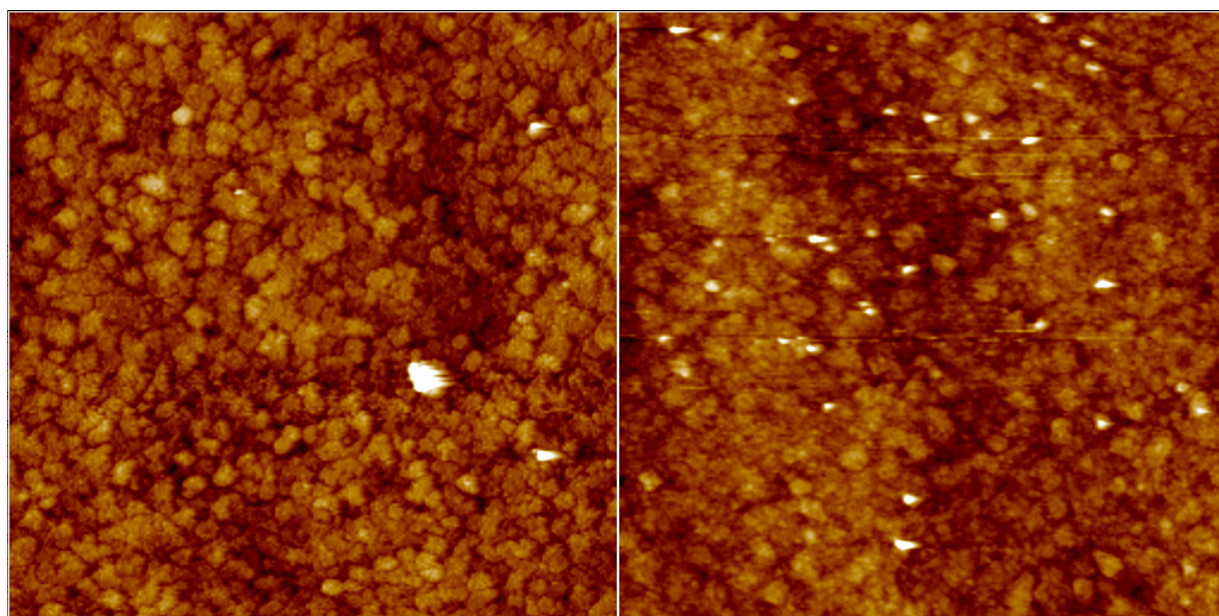

**Figure S1** 1x1  $\mu\text{m}^2$  STM images for the in-field and no-field samples, left and right, respectively.

### Simulations of the P-MOKE loops

Simulations that best reproduced the measured hard P-MOKE loops were performed by minimizing the total energy in the form:

$$E(\theta, \varphi) = -\frac{\sqrt{3}}{3} H M_s [\sin \theta \cos \varphi + \sin \theta \sin \varphi + \cos \theta] + K_1 [\sin^4 \theta \sin^2 \varphi \cos^2 \varphi + \sin^2 \theta \cos^2 \theta] + K_2 [\sin^4 \theta \cos^2 \theta \sin^2 \varphi \cos^2 \varphi] + (2\pi M_s^2 - K_u) \left[ \frac{1}{3} + \frac{2}{3} \sin^2 \theta \sin \varphi \cos \varphi + \frac{2}{3} \sin \theta \cos \theta (\sin \varphi + \cos \varphi) \right] + K_u \gamma \left[ \frac{1}{3} + \frac{2}{3} \sin^2 \theta \sin \varphi \cos \varphi + \frac{2}{3} \sin \theta \cos \theta (\sin \varphi + \cos \varphi) \right]^2.$$

$\theta$  and  $\varphi$  are polar and azimuthal angles in the Cartesian coordinate system associated with the cubic unit cell of magnetite, and the formula above takes into account the (111)-orientation of the magnetite film and the magnetic field  $H$  that is applied along the film normal.  $M_s$  is the bulk magnetite magnetization and  $K_1$  and  $K_2$  are first- and second-order bulk magnetocrystalline anisotropy constants. The fourth and fifth term of the formula express the film-typical contributions to the total energy: the shape anisotropy that scales with  $2\pi M_s^2$ , and an additional phenomenologically introduced uniaxial anisotropy constants of the first- ( $K_u$ ) and second- ( $K_u \gamma$ ) order, which are necessary to counterbalance and overwhelm the shape anisotropy and stabilize the out-of-plane magnetization component. We are aware that such description is an oversimplification of a complex magnetization structure caused by the presence of the antiphase boundaries (compare Ref. 40 in the main text), but it allows quantification of the anisotropy changes induced by the in-field deposition.

From the equilibrium magnetization direction derived with the equilibrium conditions:  $\frac{\partial E}{\partial \theta} = \frac{\partial E}{\partial \varphi} = 0$ , the out-of-plane magnetization curves are plotted in Fig. 1S and 2S for  $K_u$  and  $\gamma$  that give the best simulation of the experimental data obtained for the no-field and in-field samples, respectively. Note that the simulations in the single-domain model are not able to properly reproduce the hysteresis. The derived  $K_u$  and  $\gamma$  values are given in the figure captions.

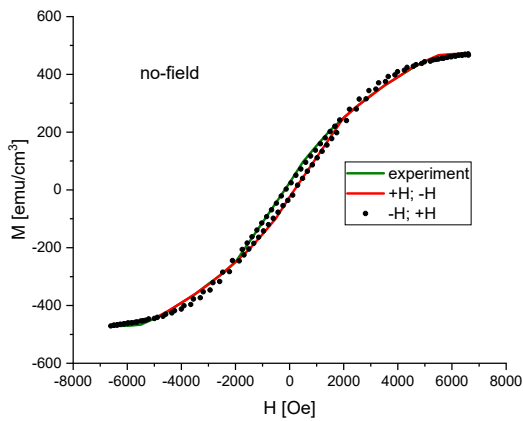

**Figure S2**  $K_u = 7.7 \cdot 10^5 \text{ erg/cm}^3$ ,  $\gamma = 0.48$

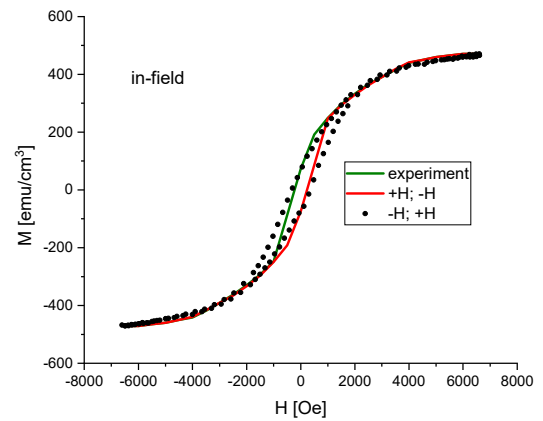

**Figure S3**  $K_u = 12.8 \cdot 10^5 \text{ erg/cm}^3$ ,  $\gamma = 0.42$
